# Supplementary material for: A Flexible and Accurate Genotype Imputation Method for the Next Generation of Genome-Wide Association Studies
Source: PubMed Central journal article supplement (PMC2689936; doi:10.1371/journal.pgen.1000529), 2009-06-19
Supplement: pgen.1000529.s003.pdf [file pgen.1000529.s003.pdf]

**Table S1**

| <b>Common<br/>SNPs</b>    |            | <b>Main iterations</b> |           |            |  |                           | <b>Rare<br/>SNPs</b> |      | <b>Main iterations</b> |           |            |
|---------------------------|------------|------------------------|-----------|------------|--|---------------------------|----------------------|------|------------------------|-----------|------------|
|                           |            | <b>20</b>              | <b>50</b> | <b>100</b> |  |                           |                      |      | <b>20</b>              | <b>50</b> | <b>100</b> |
| <b>Burn-in iterations</b> | <b>10</b>  | 4.68                   | 1.12      | 0.17       |  | <b>Burn-in iterations</b> | <b>10</b>            | 3.14 | 0.14                   | 0         |            |
|                           | <b>25</b>  | 4.85                   | 1.01      | 0.13       |  |                           | <b>25</b>            | 3.14 | 0.41                   | 0.27      |            |
|                           | <b>100</b> | 4.52                   | 0.87      | 0.08       |  |                           | <b>100</b>           | 2.82 | 0.68                   | 0         |            |
